# Supplementary material for: Validation of a handheld β-hydroxybutyrate acid meter to identify hyperketonaemia in ewes
Source: PeerJ. 2020 Apr 10;8:e8933. doi: 10.7717/peerj.8933 (PMC7153552; doi:10.7717/peerj.8933)
Supplement: Supplemental Information 1 — Each data point indicates blood beta-hydroxybutyrate acid measured by two different methods. [file peerj-08-8933-s001.xlsx]

## Sheet: BHB method comparison
Animal	Time	Blood beta-hydroxybutyrate acid by enzymatic colorimetric method (mM/L)	Blood beta-hydroxybutyrate acid by handheld meter Optium Xceed (mM/L)
35	T1	0.155	0.2
35	T10	0.485	0.7
35	T11	0.482	0.6
35	T12	0.531	0.7
35	T13	0.354	0.3
35	T2	1.479	2.3
35	T3	1.688	2.5
35	T4	1.52	2.2
35	T5	1.716	2.6
35	T6	1.668	2.6
35	T7	1.868	3.1
35	T8	0.794	1.1
35	T9	0.565	0.7
36	T1	0.334	0.4
36	T10	1.209	0.6
36	T11	0.54	0.6
36	T12	0.379	0.6
36	T13	0.295	0.4
36	T2	1.735	2.9
36	T3	2.503	4.3
36	T4	2.891	5
36	T5	3.018	5.4
36	T6	3.205	5.4
36	T7	2.563	4.4
36	T8	1.865	3.2
36	T9	1.604	0.9
39	T1	0.159	0.2
39	T10	0.657	0.8
39	T11	0.358	0.4
39	T12	0.287	0.4
39	T13	0.264	0.4
39	T2	1.483	2.7
39	T3	1.875	2.7
39	T4	2.261	3.7
39	T5	2.601	3.7
39	T6	2.966	5.4
39	T7	3.027	5.4
39	T8	2.077	3.3
39	T9	1.533	2.1
40	T1	0.245	0.2
40	T10	0.349	0.4
40	T11	0.229	0.2
40	T12	0.199	0.2
40	T13	0.182	0.2
40	T2	0.861	1
40	T3	1.526	2.4
40	T4	1.981	2.8
40	T5	1.514	2.1
40	T6	1.865	2.8
40	T7	2.003	3.1
40	T8	1.089	1.2
40	T9	0.582	0.6
44	T1	0.58	0.6
44	T10	1.363	2.3
44	T11	1.135	1.6
44	T12	0.964	1.2
44	T13	0.706	0.9
44	T2	1.862	3.1
44	T3	2.703	4.4
44	T4	2.981	4.9
44	T5	3.14	5.1
44	T6	3.282	5.8
44	T7	3.342	5.7
44	T8	2.411	4
44	T9	1.984	2.9
45	T1	0.349	0.4
45	T10	0.823	1.3
45	T11	0.589	0.9
45	T12	0.559	0.7
45	T13	0.523	0.7
45	T2	1.492	2.3
45	T3	2.343	3.5
45	T4	3.059	5.1
45	T5	3.582	5.6
45	T6	3.936	7.1
45	T7	3.867	6.9
45	T8	2.662	3.8
45	T9	1.567	2.6
46	T1	0.21	0.2
46	T10	0.525	0.7
46	T11	0.273	0.4
46	T12	0.185	0.3
46	T13	0.154	0.2
46	T2	1.164	1.9
46	T3	1.382	2.4
46	T4	1.701	2.9
46	T5	2.116	3.6
46	T6	2.229	3.7
46	T7	2.289	3.8
46	T8	1.309	1.9
46	T9	0.951	1.3
52	T1	0.147	0.2
52	T10	0.322	0.4
52	T11	0.203	0.2
52	T12	0.139	0.2
52	T13	0.203	0.2
52	T2	1.165	1.2
52	T3	1.154	1.7
52	T4	1.387	2
52	T5	1.471	2.6
52	T6	1.592	2.7
52	T7	1.598	2.4
52	T8	0.723	1
52	T9	0.477	0.7
56	T1	0.17	0.2
56	T10	0.515	0.7
56	T11	0.332	0.4
56	T12	0.245	0.2
56	T13	0.229	0.2
56	T2	1.094	1.5
56	T3	1.379	1.8
56	T4	1.488	2.2
56	T5	1.572	2.3
56	T6	1.656	2.3
56	T7	1.72	2.6
56	T8	1.022	1.3
56	T9	0.711	0.9
57	T1	0.105	0.1
57	T10	0.34	0.4
57	T11	0.167	0.2
57	T12	0.11	0.2
57	T13	0.117	0.2
57	T2	0.683	0.8
57	T3	1.257	2.1
57	T4	1.489	2.2
57	T5	1.678	2.7
57	T6	1.589	2.7
57	T7	1.621	2.4
57	T8	0.862	1.2
57	T9	0.544	0.6
59	T1	0.162	0.1
59	T10	0.481	0.7
59	T11	0.305	0.4
59	T12	0.455	0.4
59	T13	0.224	0.2
59	T2	1.616	2.6
59	T3	2.284	4.1
59	T4	2.384	3.8
59	T5	2.418	4
59	T6	2.431	3.9
59	T7	2.228	3.4
59	T8	1.274	1.7
59	T9	0.931	1.3
85	T1	0.371	0.3
85	T10	0.478	0.6
85	T11	0.547	0.6
85	T12	0.279	0.3
85	T13	0.268	0.3
85	T2	1.281	1.4
85	T3	1.556	2.2
85	T4	1.47	1.8
85	T5	1.675	1.9
85	T6	1.721	2
85	T7	1.708	2
85	T8	1.146	1.2
85	T9	0.829	1
86	T1	0.355	0.4
86	T10	0.86	1.2
86	T11	0.575	0.6
86	T12	0.749	1
86	T13	0.563	0.8
86	T2	1.479	2.2
86	T3	2.185	3.4
86	T4	2.485	4.1
86	T5	2.868	4.7
86	T6	2.982	5.1
86	T7	3.138	5.4
86	T8	1.747	2.8
86	T9	1.286	2
88	T1	0.259	0.2
88	T10	0.295	0.4
88	T11	0.213	0.2
88	T12	0.211	0.2
88	T13	0.267	0.2
88	T2	1.096	0.7
88	T3	1.996	3
88	T4	2.235	3.3
88	T5	2.221	3.4
88	T6	2.323	3.4
88	T7	1.942	2.4
88	T8	1.07	1.2
88	T9	0.751	0.8
96	T1	0.315	0.4
96	T10	1.207	1.9
96	T11	0.663	0.9
96	T12	0.545	0.8
96	T13	0.594	0.6
96	T2	1.619	2.5
96	T3	2.207	3.9
96	T4	2.515	4.1
96	T5	2.706	4.8
96	T6	3.142	5.4
96	T7	2.972	5.2
96	T8	2.165	3.5
96	T9	1.781	2.9
97	T1	0.182	0.2
97	T10	0.49	0.7
97	T11	0.292	0.3
97	T12	0.236	0.2
97	T13	0.249	0.3
97	T2	1.194	2
97	T3	1.611	2.4
97	T4	1.649	2.7
97	T5	1.902	3
97	T6	2.183	3.4
97	T7	2.003	3.2
97	T8	1.153	1.5
97	T9	0.774	1.1
98	T1	0.152	0.2
98	T10	0.264	0.3
98	T11	0.243	0.3
98	T12	0.223	0.2
98	T13	0.439	0.2
98	T2	1.094	1.8
98	T3	1.447	2.3
98	T4	1.497	2.4
98	T5	1.576	2.4
98	T6	1.616	2.6
98	T7	1.396	2.1
98	T8	0.619	0.8
98	T9	0.399	0.6
1717	T1	0.315	0.4
1717	T10	0.569	0.7
1717	T11	0.749	1.1
1717	T12	0.689	0.9
1717	T13	0.623	0.8
1717	T2	1.328	2.9
1717	T3	1.833	2.9
1717	T4	1.859	2.6
1717	T5	1.423	1.9
1717	T6	1.566	2.7
1717	T7	1.756	3.2
1717	T8	0.876	1.1
1717	T9	0.519	0.7
2201	T1	0.326	0.4
2201	T10	0.528	0.8
2201	T11	0.438	0.6
2201	T12	0.53	0.6
2201	T13	0.472	0.6
2201	T2	1.133	1.7
2201	T3	1.668	2.6
2201	T4	1.977	3.3
2201	T5	1.91	2.8
2201	T6	1.914	2.9
2201	T7	1.86	3
2201	T8	0.864	1.9
2201	T9	0.829	1.2

## Sheet: Passing and Bablok regression
Passing and Bablok regression
Variable X	GS
Variable Y	HHM
Sample size	247
	Variable X	Variable Y
Lowest value	0.105	0.1
Highest value	3.936	7.1
Arithmetic mean	1.254	1.9045
Median	1.164	1.7
Standard deviation	0.8943	1.5615
Standard error of the mean	0.0569	0.09935
Regression Equation
y = -0,187241 + 1,691007 x
Systematic differences
Intercept A	-0.1872
95% CI	-0,2155 to -0,1623
Proportional differences
Slope B	1.691
95% CI	1,6570 to 1,7241
Random differences
Residual Standard Deviation (RSD)	0.1368
± 1.96 RSD Interval	-0,2682 to 0,2682
Linear model validity
Cusum test for linearity	Significant deviation from linearity (P<0,01)
Spearman rank correlation coefficient
Correlation coefficient	0.984
Significance level	P<0,0001
95% CI	0,979 to 0,987
